# Supplementary material for: Z-Scheme Heterojunction of SnS2/Bi2WO6 for Photoreduction of CO2 to 100% Alcohol Products by Promoting the Separation of Photogenerated Charges
Source: MDPI journal article supplement (doi:10.3390/nano12122030), 2022-06-13
Supplement: s1 [file s1]

# Supporting Information

## Z-Scheme Heterojunction of SnS<sub>2</sub>/Bi<sub>2</sub>WO<sub>6</sub> for Photoreduction of CO<sub>2</sub> to 100% Alcohol Products by Promoting the Separation of Photogenerated Charges

Yong Xu, Juanjuan Yu, Jianfei Long, Lingxiao Tu, Weili Dai \* and Lixia Yang

Key Laboratory of Jiangxi Province for Persistent Pollutants Control and Resources Recycle,  
School of Environmental and Chemical Engineering, Nanchang Hangkong University, Nanchang 330063, China; xu\_yong001@163.com (Y.X.); qddxhhh\_1@sina.com (J.Y.); 15007047545@139.com (J.L.); 2002085700109@stu.nchu.edu.cn (L.T.); zgay20080808@126.com (L.Y.)  
\* Correspondence: wldai81@126.com

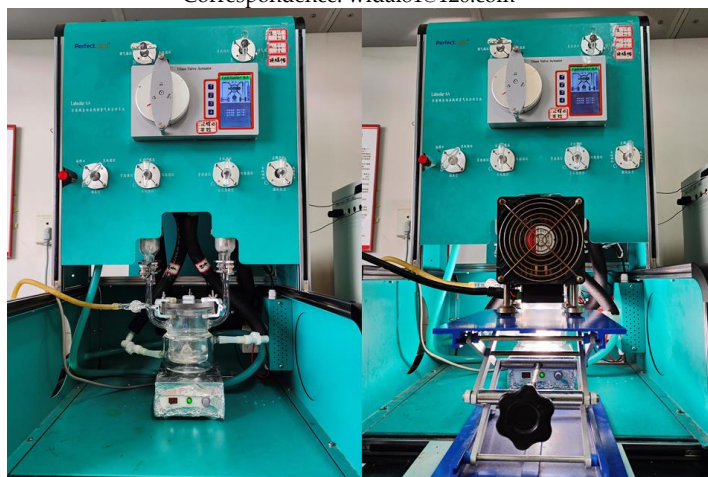

**Figure S1** Reaction device diagram.

The reaction device in this work is shown in Figure S1. In the photocatalytic reaction, high-purity CO<sub>2</sub> gas is continuously bubbling into the reactor from the gas inlet. The reactor is connected to condensed water and the temperature is kept at 4 °C.

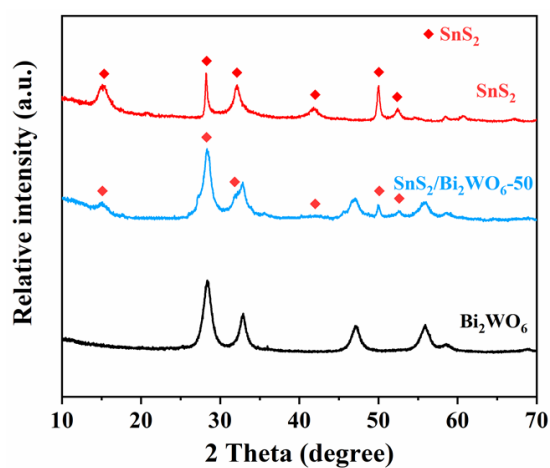

**Figure S2** XRD spectra of SnS<sub>2</sub>/Bi<sub>2</sub>WO<sub>6</sub>-50.

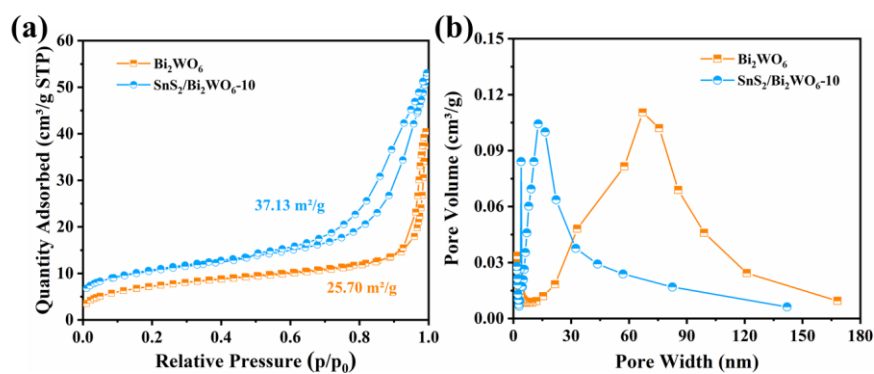

**Figure S3** (a) N<sub>2</sub> adsorption-desorption isotherms, and (b) pore size distribution profiles of Bi<sub>2</sub>WO<sub>6</sub> and SnS<sub>2</sub>/Bi<sub>2</sub>WO<sub>6</sub>-10.

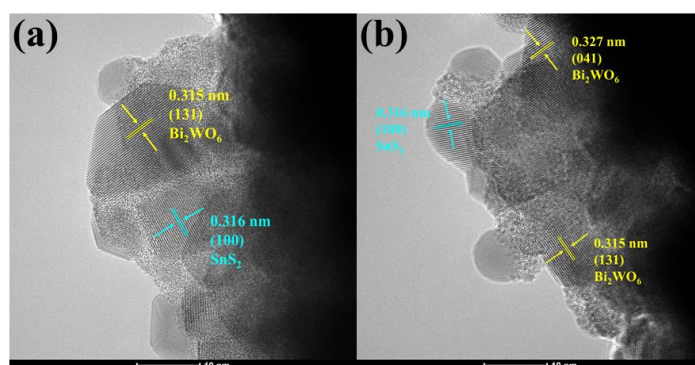

**Figure S4** HRTEM spectra of SnS<sub>2</sub>/Bi<sub>2</sub>WO<sub>6</sub>-10.

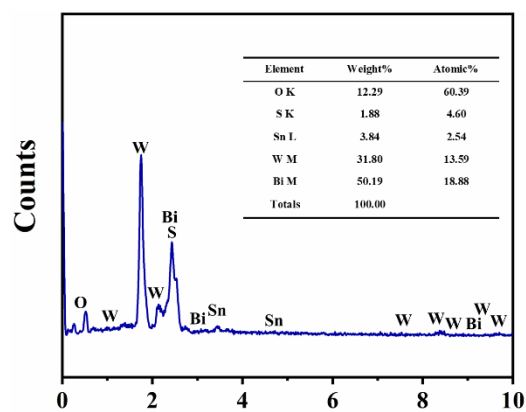

Figure S5 EDS spectrum of SnS<sub>2</sub>/Bi<sub>2</sub>WO<sub>6</sub>-10.

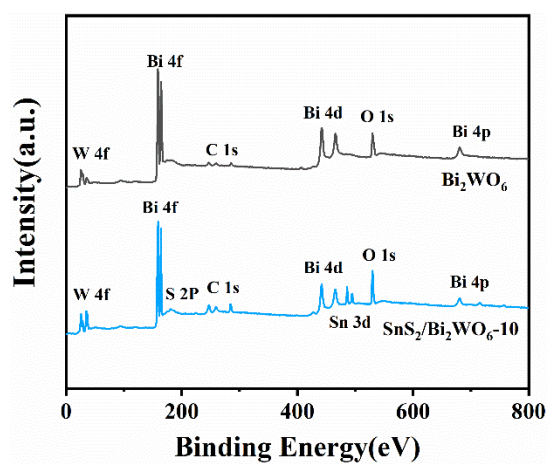

Figure S6 XPS survey spectra of Bi<sub>2</sub>WO<sub>6</sub> and SnS<sub>2</sub>/Bi<sub>2</sub>WO<sub>6</sub>-10.

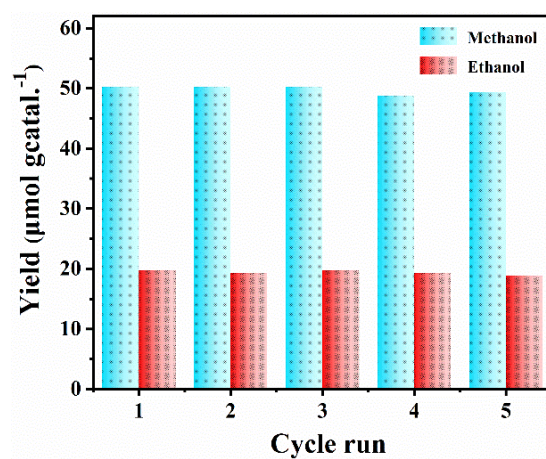

Figure S7 Cycling tests with catalyst SnS<sub>2</sub>/Bi<sub>2</sub>WO<sub>6</sub>-10 for 4 h irradiation.

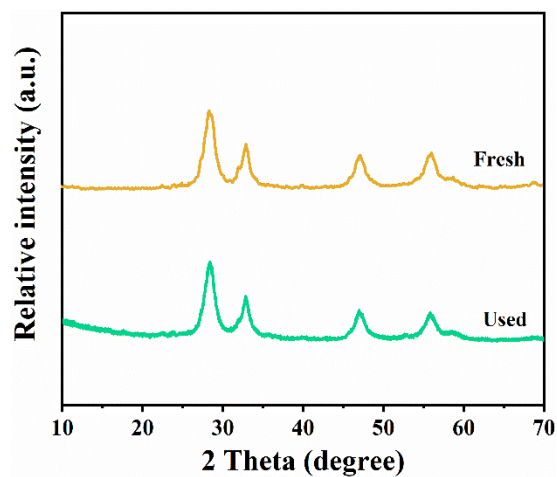

**Figure S8** XRD patterns before and after recycling.

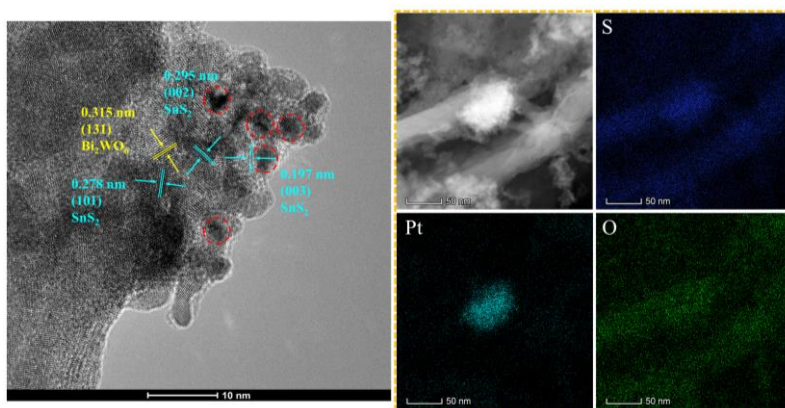

**Figure S9** HRTEM spectra of 1%Pt-SnS<sub>2</sub>/Bi<sub>2</sub>WO<sub>6</sub>-10.

**Table S1** The comparison of CO<sub>2</sub> photoreduction performance

| Photocatalyst                                           | Light sources         | Main products                    | Formation rate (μmol g <sup>-1</sup> h <sup>-1</sup> ) | Ref.      |
|---------------------------------------------------------|-----------------------|----------------------------------|--------------------------------------------------------|-----------|
| Bi <sub>2</sub> WO <sub>6</sub> /SnS <sub>2</sub>       | $\lambda \geq 420$ nm | CH <sub>3</sub> OH               | 12.55                                                  | This work |
|                                                         |                       | C <sub>2</sub> H <sub>5</sub> OH | 4.93                                                   |           |
| Bi <sub>2</sub> MoO <sub>6</sub>                        | $\lambda \geq 420$ nm | CH <sub>3</sub> OH               | 6.2                                                    | 29        |
| 10% MoS <sub>2</sub> /TiO <sub>2</sub>                  | 350 W Xe lamp         | CH <sub>4</sub>                  | 2.86                                                   | 30        |
|                                                         |                       | CH <sub>3</sub> OH               | 2.55                                                   |           |
| CuIn <sub>2</sub> S <sub>4</sub> -0.33/TiO <sub>2</sub> | 300 W Xe lamp         | CH <sub>4</sub>                  | 1.14                                                   | 31        |

|                                     |                                    |                    |      |    |
|-------------------------------------|------------------------------------|--------------------|------|----|
| Ag-Mn-N/TiO <sub>2</sub>            | 300 W Xe arc<br>lamp               | CH <sub>3</sub> OH | 0.53 | 32 |
| PPy/Bi <sub>2</sub> WO <sub>6</sub> | 300 W Xe<br>lamp                   | CH <sub>3</sub> OH | 14.1 | 33 |
| Pd/Gd(OH) <sub>3</sub>              | 500 W high-<br>pressure Xe<br>lamp | CH <sub>3</sub> OH | 0.74 | 34 |
| CeO <sub>2</sub> -TiO <sub>2</sub>  | 500 W Xe<br>lamp                   | CH <sub>3</sub> OH | 6.3  | 35 |

---
